# Supplementary material
Source: HighWire-hosted journal article supplement (https://bmjleader.bmj.com/highwire/filestream/2136/field_highwire_adjunct_files/0/leader-2021-000502supp001_data_supplement.pdf)
Supplement: leader-2021-000502supp001_data_supplement.pdf [file leader-2021-000502supp001_data_supplement.pdf]

leader-2021-000502.R1

### ***Supplementary Material***

The disseminated output of the Nightingale Frontline Leadership Support Service can be viewed here:

<https://www.bing.com/videos/search?q=nightigale+frountline+you+tube&docid=608049545359068280&mid=68EFBDD77E009D79526F68EFBDD77E009D79526F&view=detail&FORM=VIRE>

\*At the time of writing, the Nightingale Frontline Support Service is pending UK Trademark.
